# Supplementary material for: Genome Characterization and Phylogenetic Analysis of Scale Drop Disease Virus Isolated From Asian Seabass (<em>Lates calcarifer</em>)
Source: Preprints.org preprint supplement (doi:10.20944/preprints202406.0836.v1), 2024-06-12
Supplement: Supplementary file 1 [file Supplementary figure.docx]

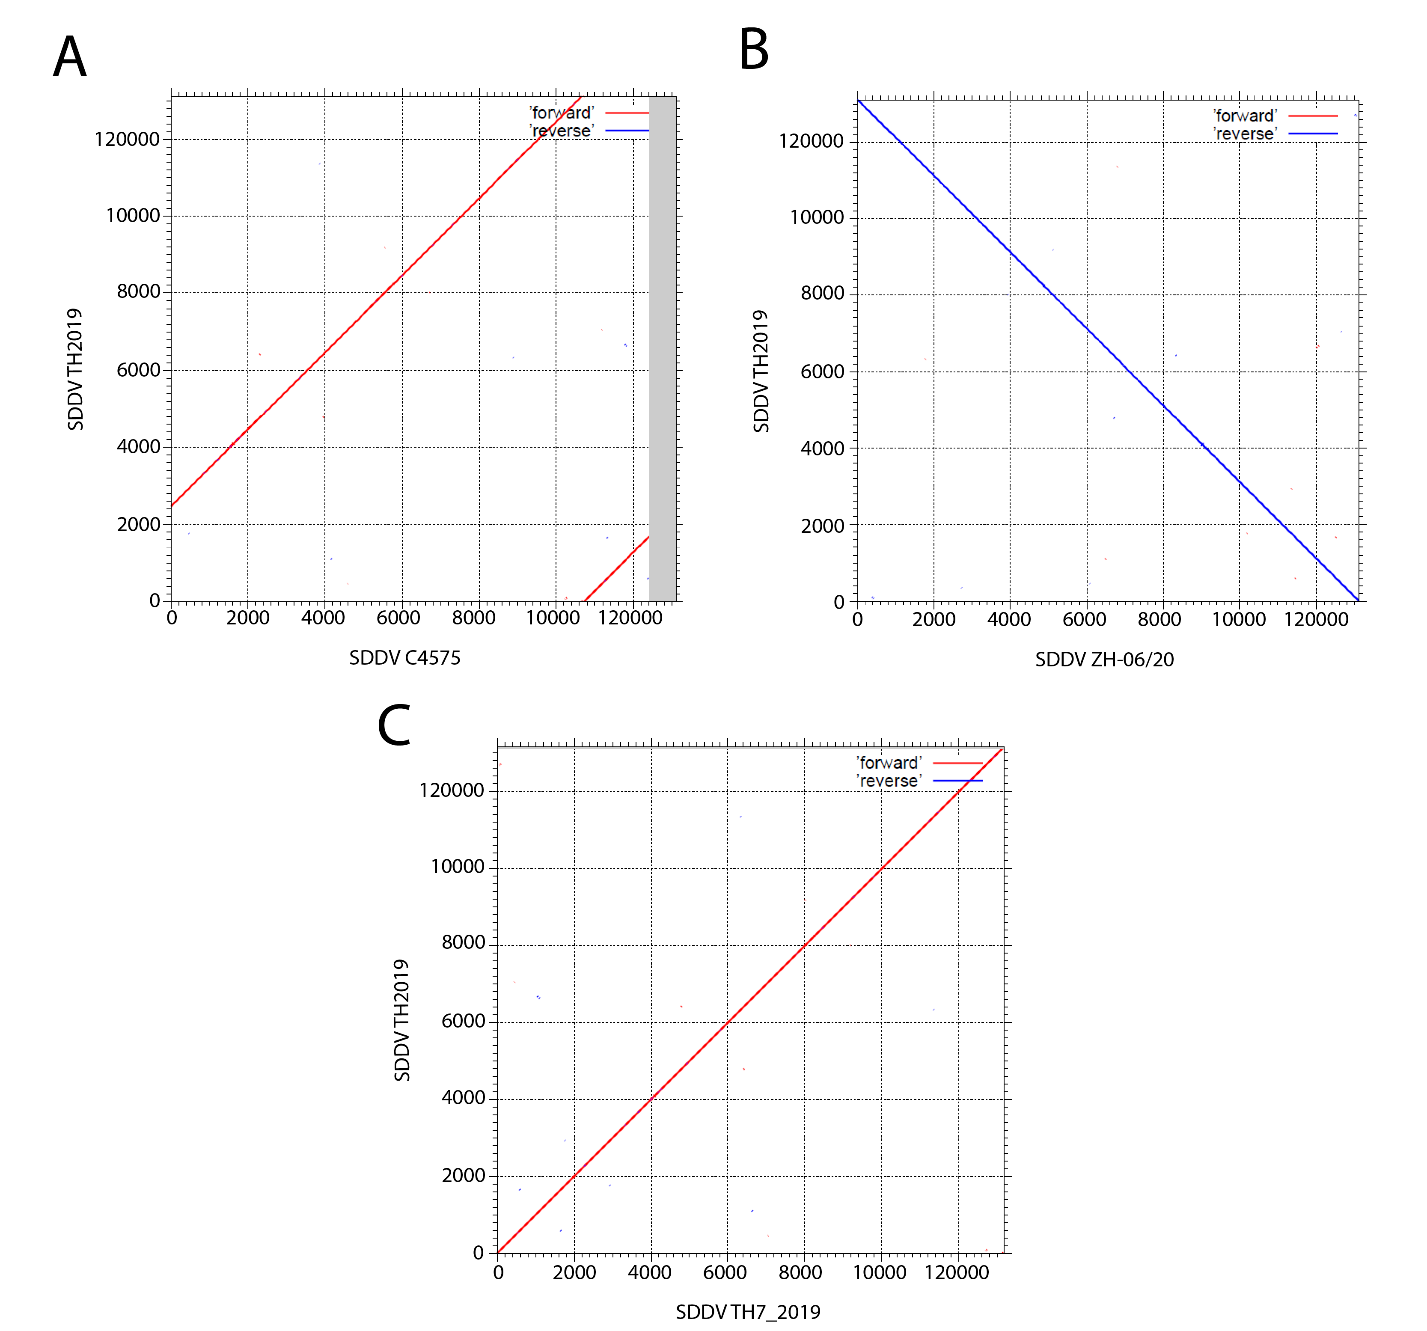
Figure S1. Dot plot of whole genome sequence alignment between the reference genome (SDDV TH 2019) and (A) SDDV TH2019, (B) C4575, and (C) ZH-06/20.


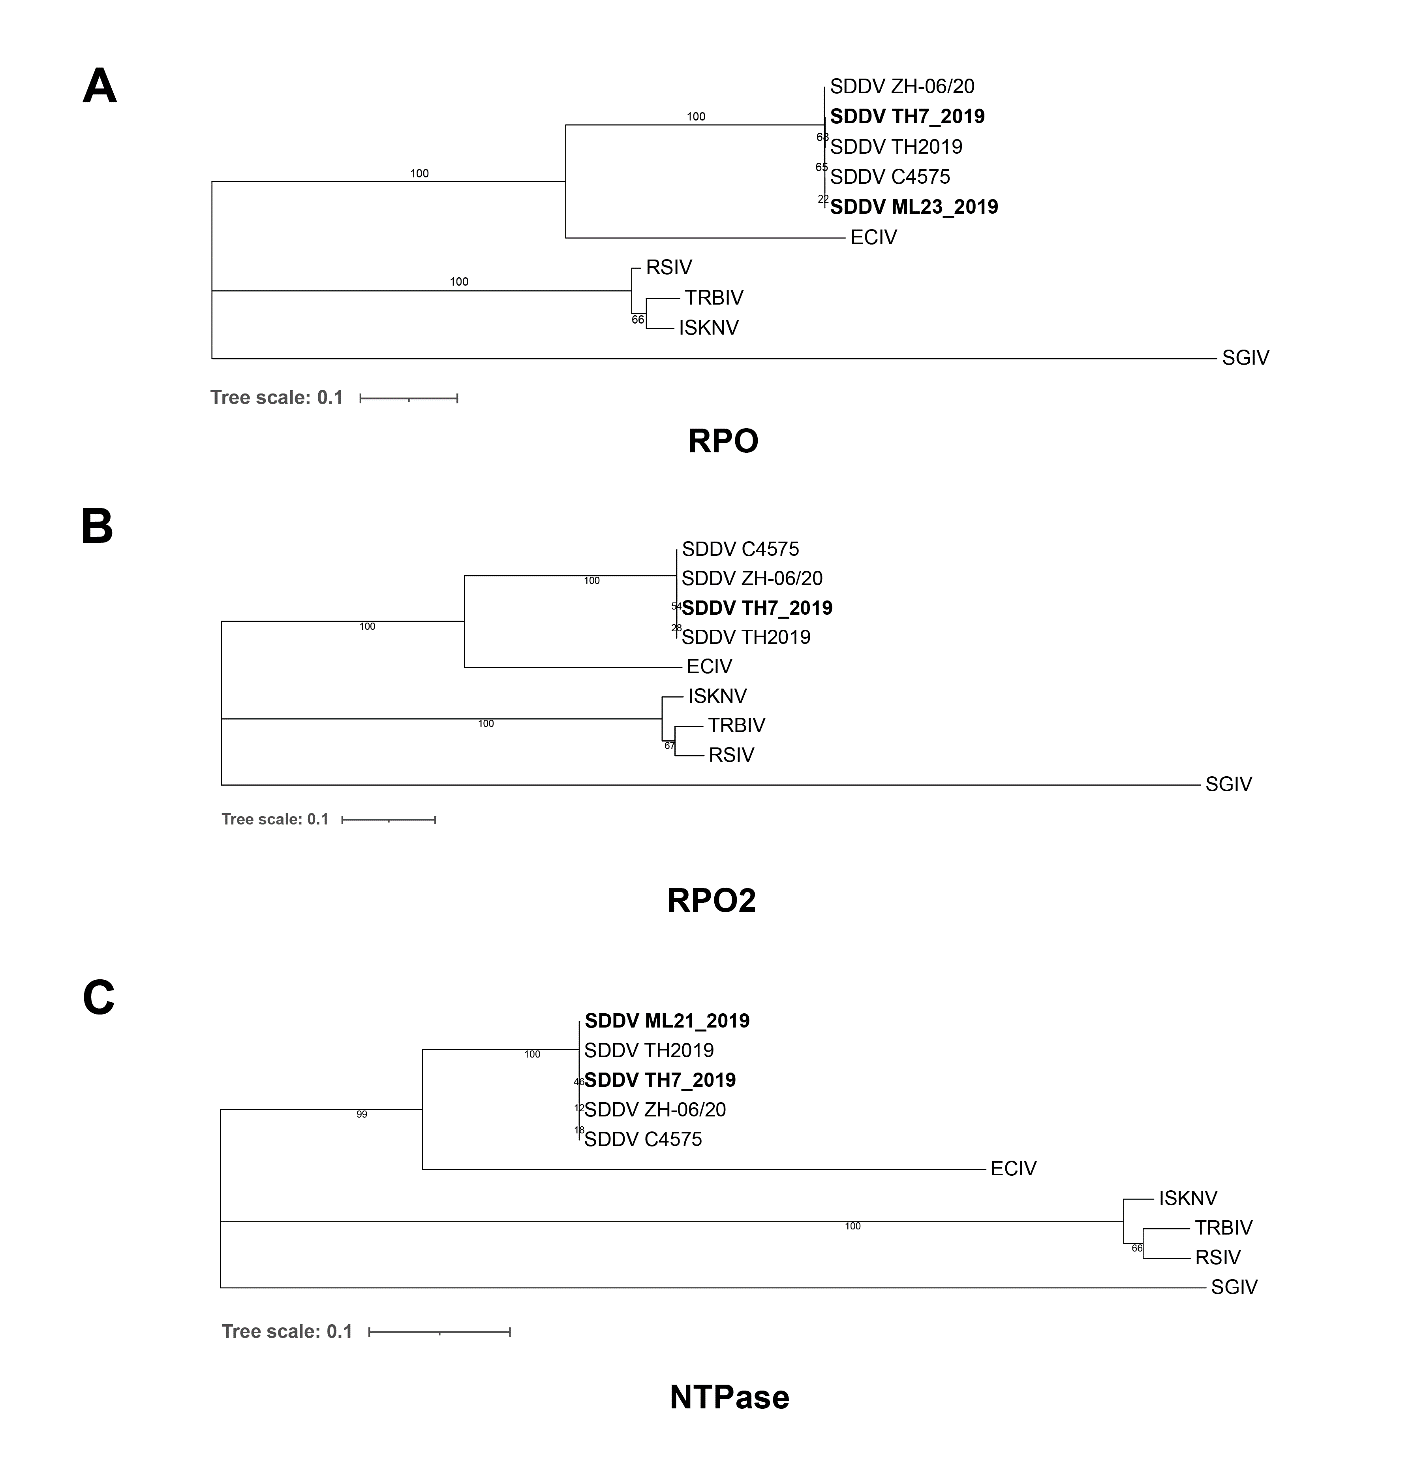
Figure S2. Maximum-likelihood tree based on (A) DNA-dependent RNA polymerase II alpha subunit (RPO), (B) DNA-dependent RNA polymerase II beta subunit (RPO2), and (C) NTPase gene constructed using MEGA X software with K2 + G nucleotide substitution model and 1,000 replications. Scale bar represents nucleotide substitution per site. Names in bold represent SDDV strains from this study. SGIV, belonging to the genus *Ranavirus*, was used as an outgroup. Bootstrap support values in percentage are shown at the tree node.


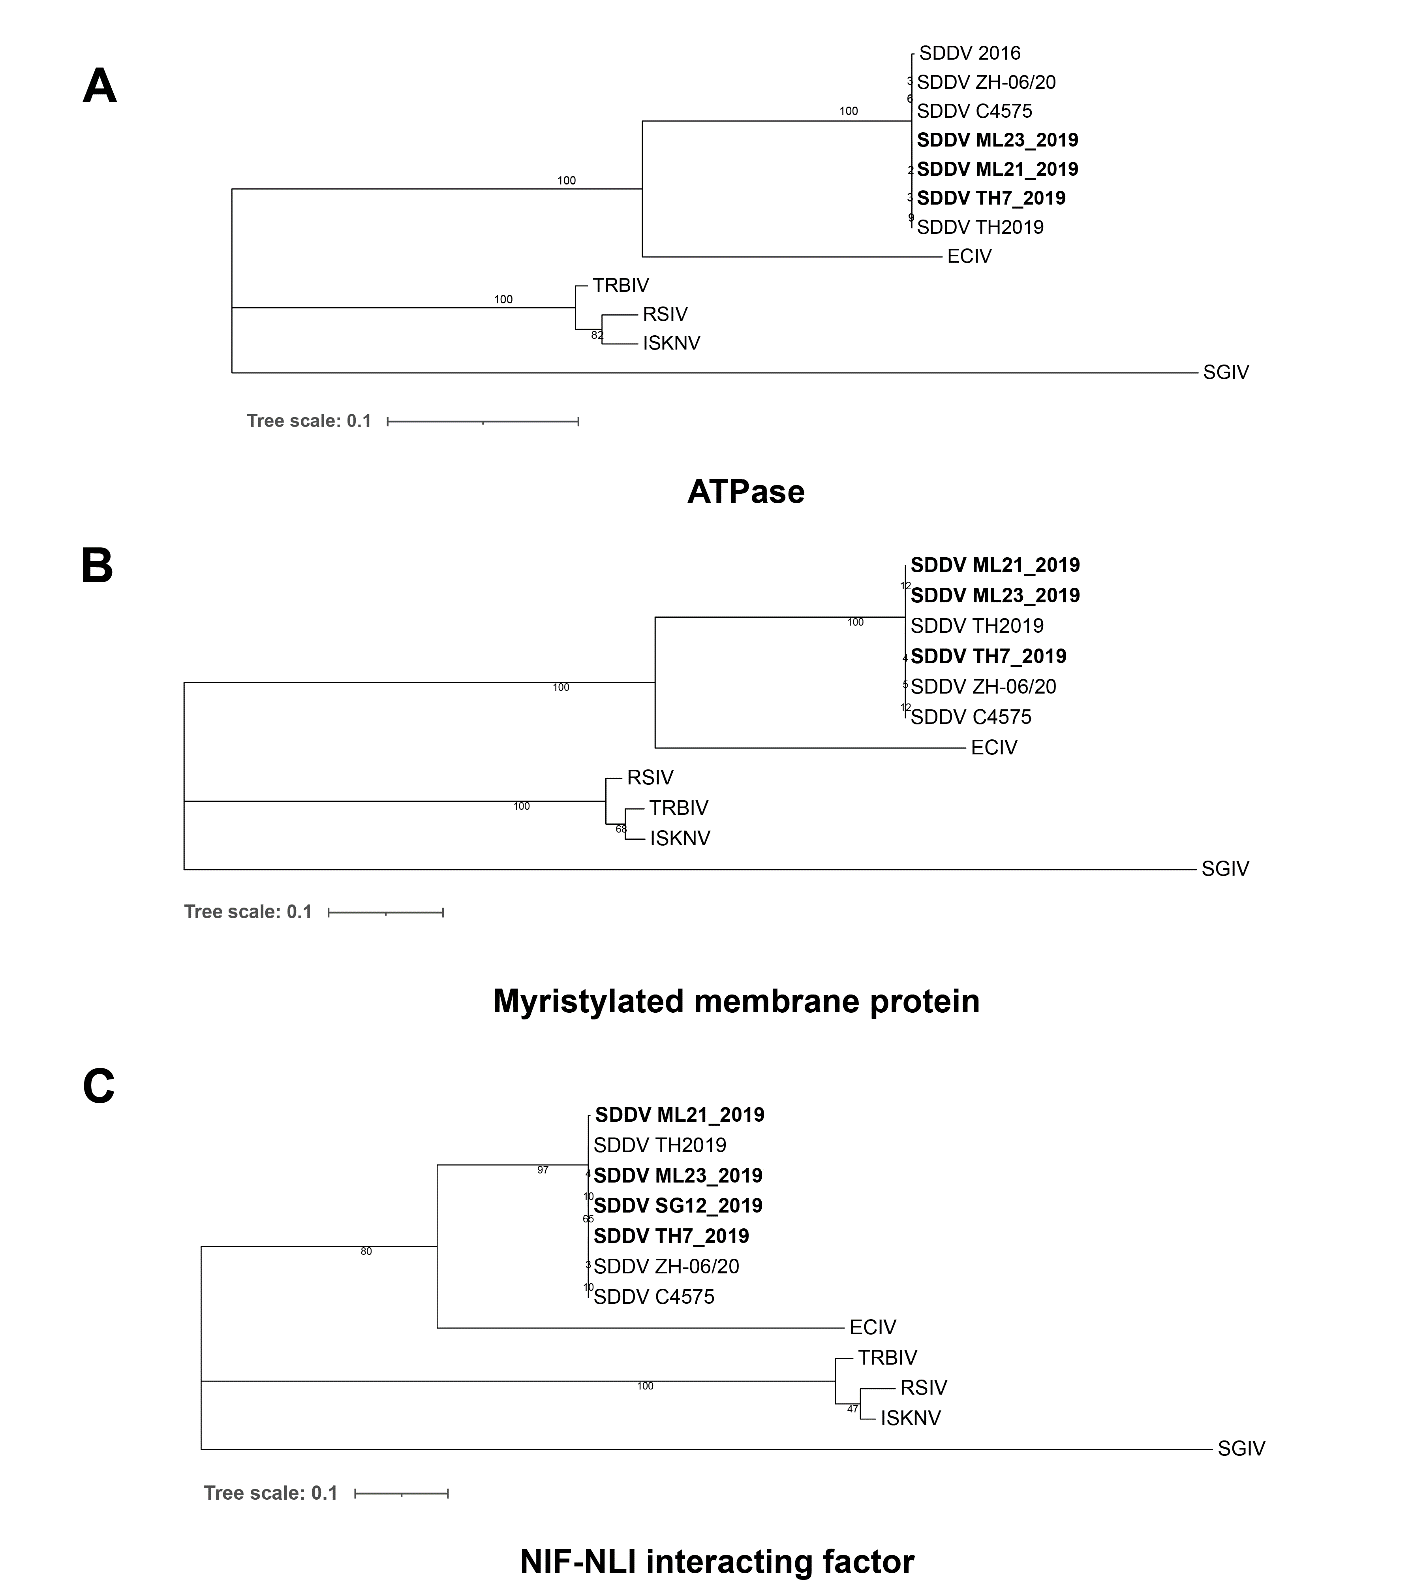
Figure S3. Maximum-likelihood tree based on (A) ATPase, (B) myristylated membrane protein, and (C) NIF-NLI interacting factor gene constructed using MEGA X software with K2 + G nucleotide substitution model and 1,000 replications. Scale bar represents nucleotide substitution per site. Names in bold represents SDDV strains from this study. SGIV, belonging to the genus *Ranavirus*, was used as an outgroup. Bootstrap support values in percentage are shown at the tree node.


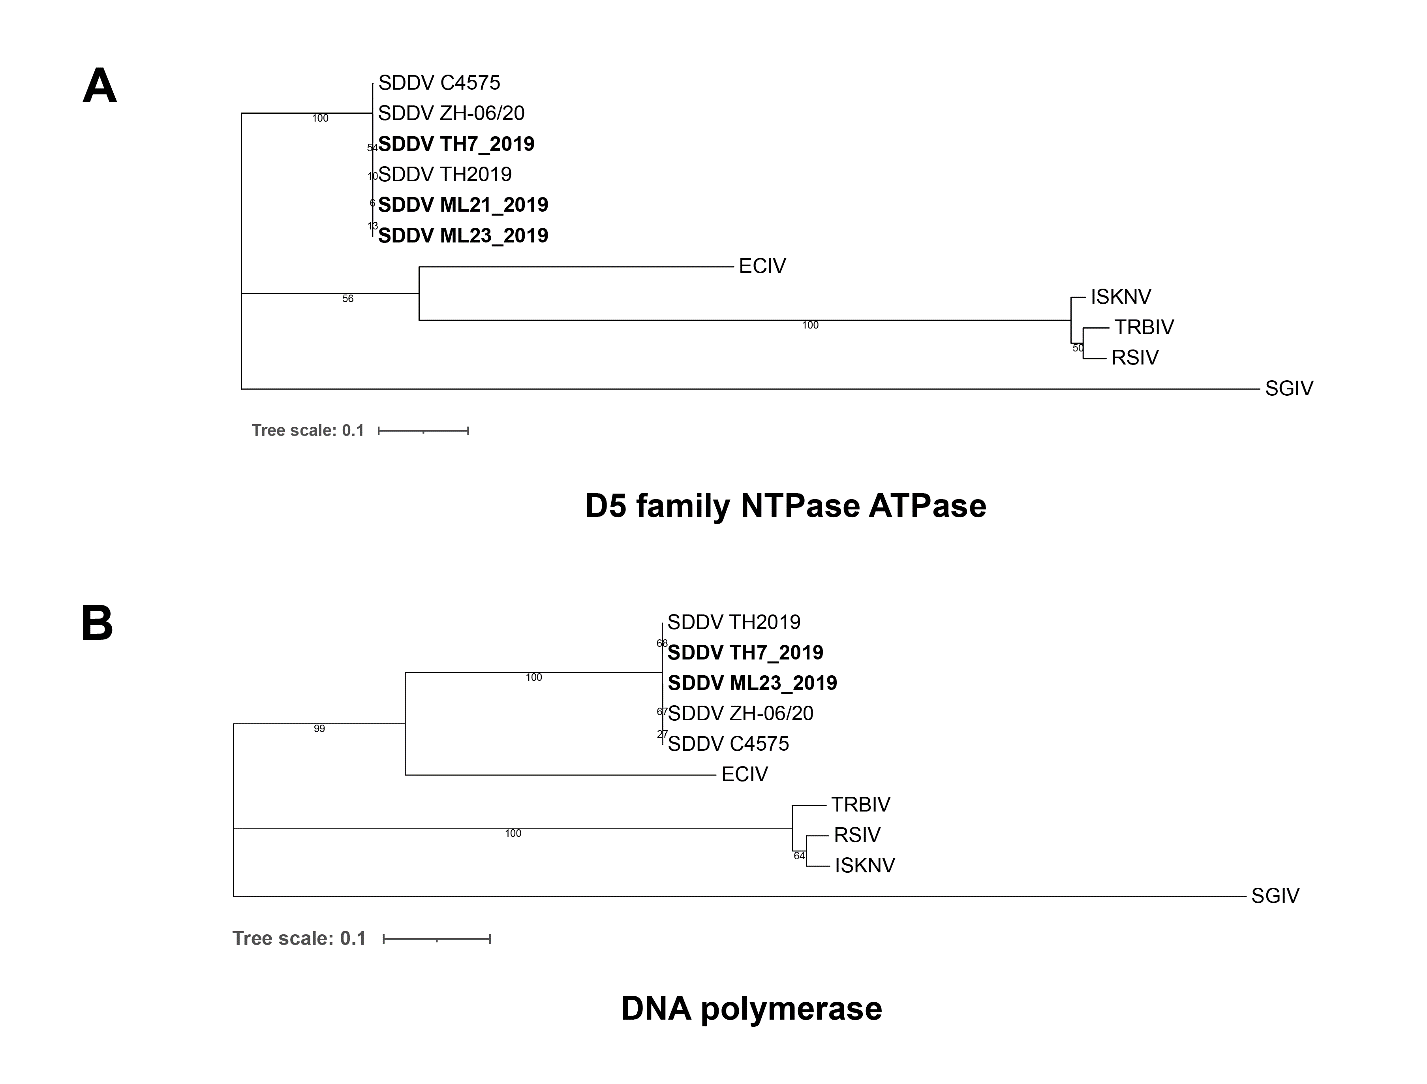


Figure S4. Maximum-likelihood tree based on (A) D5 family NTPase ATPase and (B) DNA polymerase gene constructed using MEGA X software with GTR + G nucleotide substitution model and 1,000 replications. Scale bar represents nucleotide substitution per site. Names in bold represent SDDV strains from this study. SGIV, belonging to the genus *Ranavirus*, was used as an outgroup. Bootstrap support values in percentage are shown at the tree node.


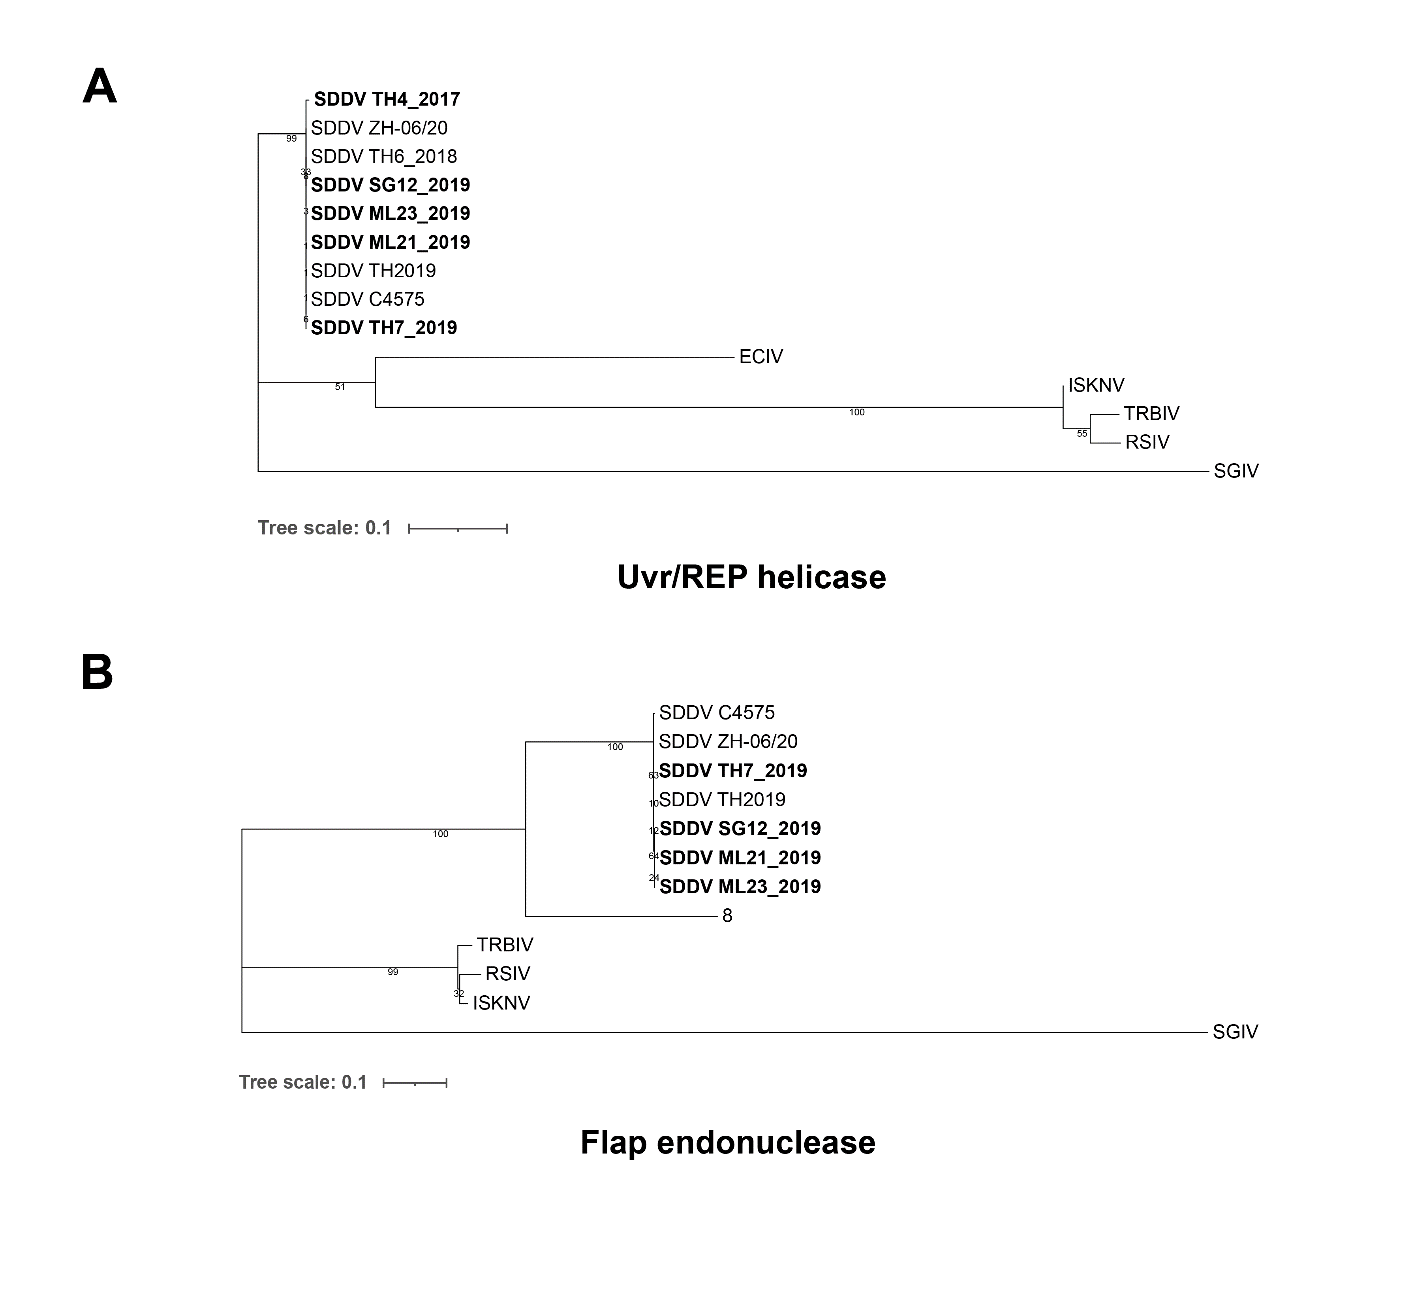
Figure S5. Maximum-likelihood tree based on (A) Uvr/REP helicase and (B) flap endonuclease gene constructed using MEGA X software with K2 + G + I nucleotide substitution model and 1,000 replications. Scale bar represents nucleotide substitution per site. Names in bold represent SDDV strains from this study. SGIV, belonging to the genus *Ranavirus*, was used as an outgroup. Bootstrap support values in percentage are shown at the tree node.
